# Supplementary material for: Mice doubly deficient in Six4 and Six5 show ventral body wall defects reproducing human omphalocele
Source: PubMed Central journal article supplement (PMC6215434; doi:10.1242/dmm.034611), 2018-10-25
Supplement: dmm-11-034611-s1.pdf [file dmm-11-034611-s1.pdf]

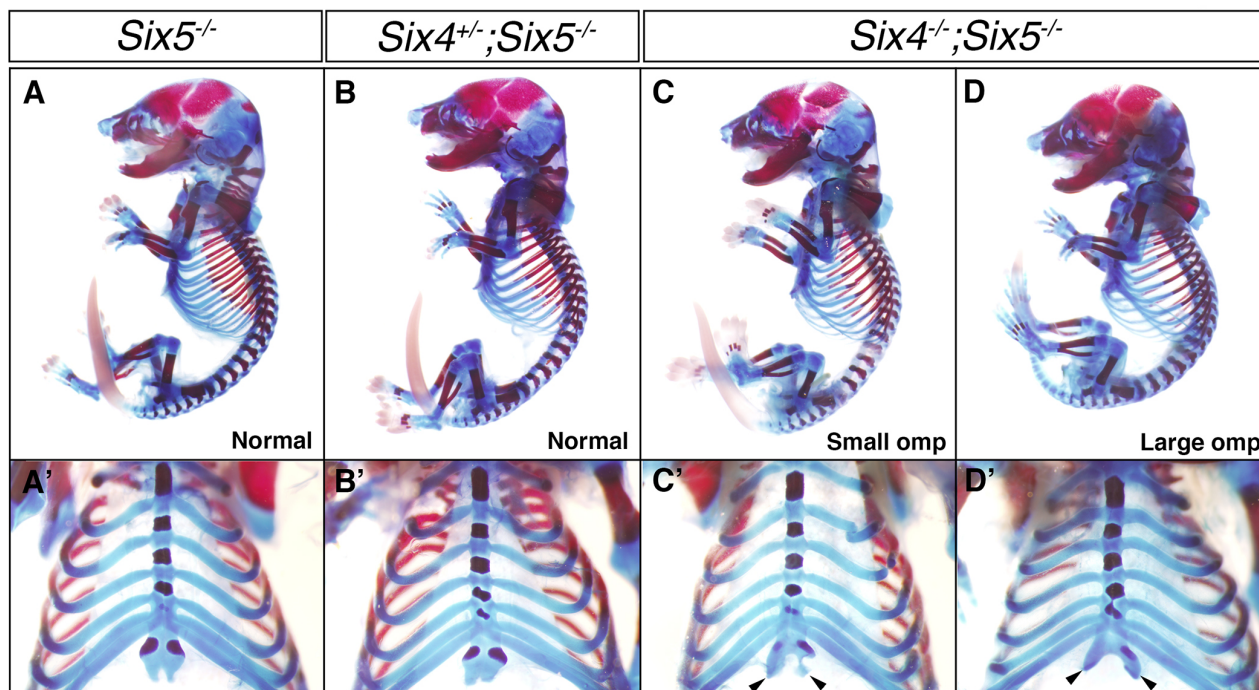

**Fig. S1. Thoracic skeletal structure in *Six5*<sup>-/-</sup>, *Six4*<sup>+/-</sup>;*Six5*<sup>-/-</sup> and *Six4*<sup>-/-</sup>;*Six5*<sup>-/-</sup> fetuses.** (A-D') Thoracic skeletal structure of E18.5 *Six5*<sup>-/-</sup> (A, A'), *Six4*<sup>+/-</sup>;*Six5*<sup>-/-</sup> (B, B') and *Six4*<sup>-/-</sup>;*Six5*<sup>-/-</sup> fetuses with small omphalocele (omp) (C, C'), and *Six4*<sup>-/-</sup>;*Six5*<sup>-/-</sup> fetuses with large omphalocele (omp) (D, D'). Bones and cartilage are stained with alizarin red and alcian blue, respectively. To clearly visualize sternums, a piece of Whatman paper was inserted under the sternums. *Six4*<sup>-/-</sup>;*Six5*<sup>-/-</sup> fetuses with small or large omphalocele show normal numbers of ribs and sternums (C', small omp, n=2/2; D', large omp, n=4/4), but the xiphoid processes bifurcate abnormally (arrowheads in C', D') compared to those of *Six5*<sup>-/-</sup> fetuses (A').

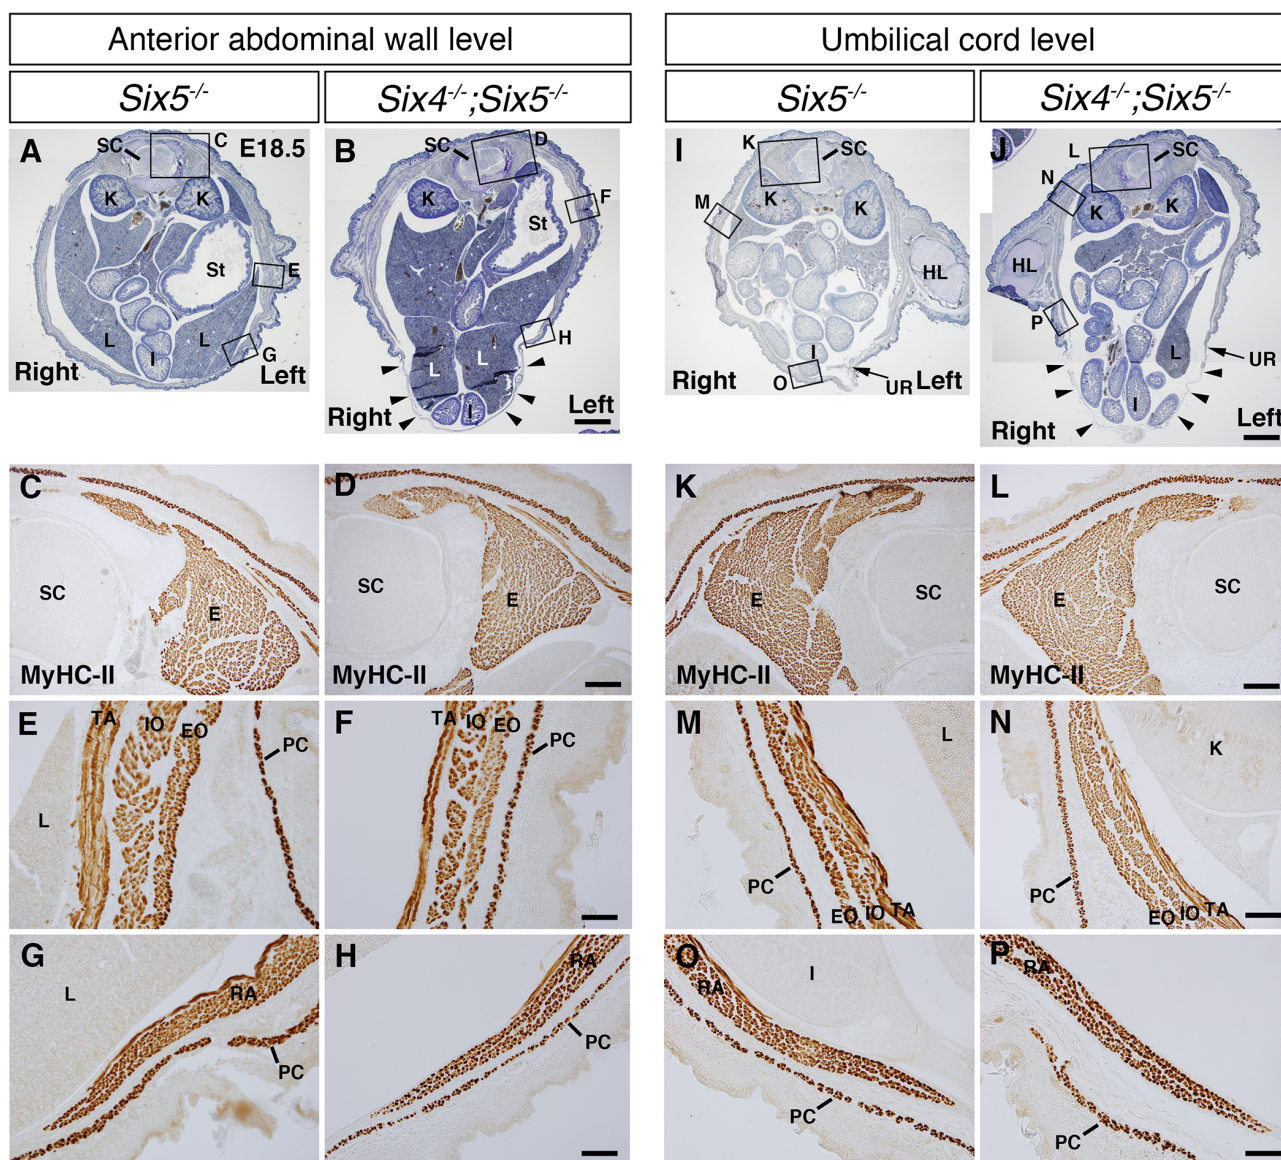

**Fig. S2. Organization of abdominal muscles in *Six5*<sup>-/-</sup> and *Six4*<sup>-/-</sup>;*Six5*<sup>-/-</sup> fetuses at E18.5.** (A-P) Hematoxylin staining of paraffin sections taken from the anterior abdominal wall level (A, B) and the umbilical ring level (I, J) of E18.5 *Six5*<sup>-/-</sup> and *Six4*<sup>-/-</sup>;*Six5*<sup>-/-</sup> fetuses with large omphalocele, respectively. Protruded liver and intestine are covered with the peritoneum and amnion (arrowheads in B, J). Localization of MyHC-II in abdominal wall muscles (C-H, K-P). Each panel corresponds to the area surrounded with rectangles in A, B, I, and J. Orientations of the fibers of four abdominal skeletal muscles, specifically the transversus abdominis muscle (TA), internal oblique muscle (IO), external oblique muscle (EO), and rectus abdominis muscle (RA), in *Six4*<sup>-/-</sup>;*Six5*<sup>-/-</sup> fetuses were similar to those in *Six5*<sup>-/-</sup> fetuses (E-H, M-P). Extensor muscle (E) and panniculus carnosus muscle (PC) develop similarly in *Six4*<sup>-/-</sup>;*Six5*<sup>-/-</sup> fetuses compared to the *Six5*<sup>-/-</sup> fetuses at the anterior abdominal wall and umbilical cord levels (C-H, K-P). HL, hindlimb; I, intestine; K, kidney; L, liver; SC, spinal cord; St, stomach; UR, umbilical ring. Scale bars: 1 mm in A, B, I, J; 200 μm in C, D, K, L; 100 μm in E-H, M-P.

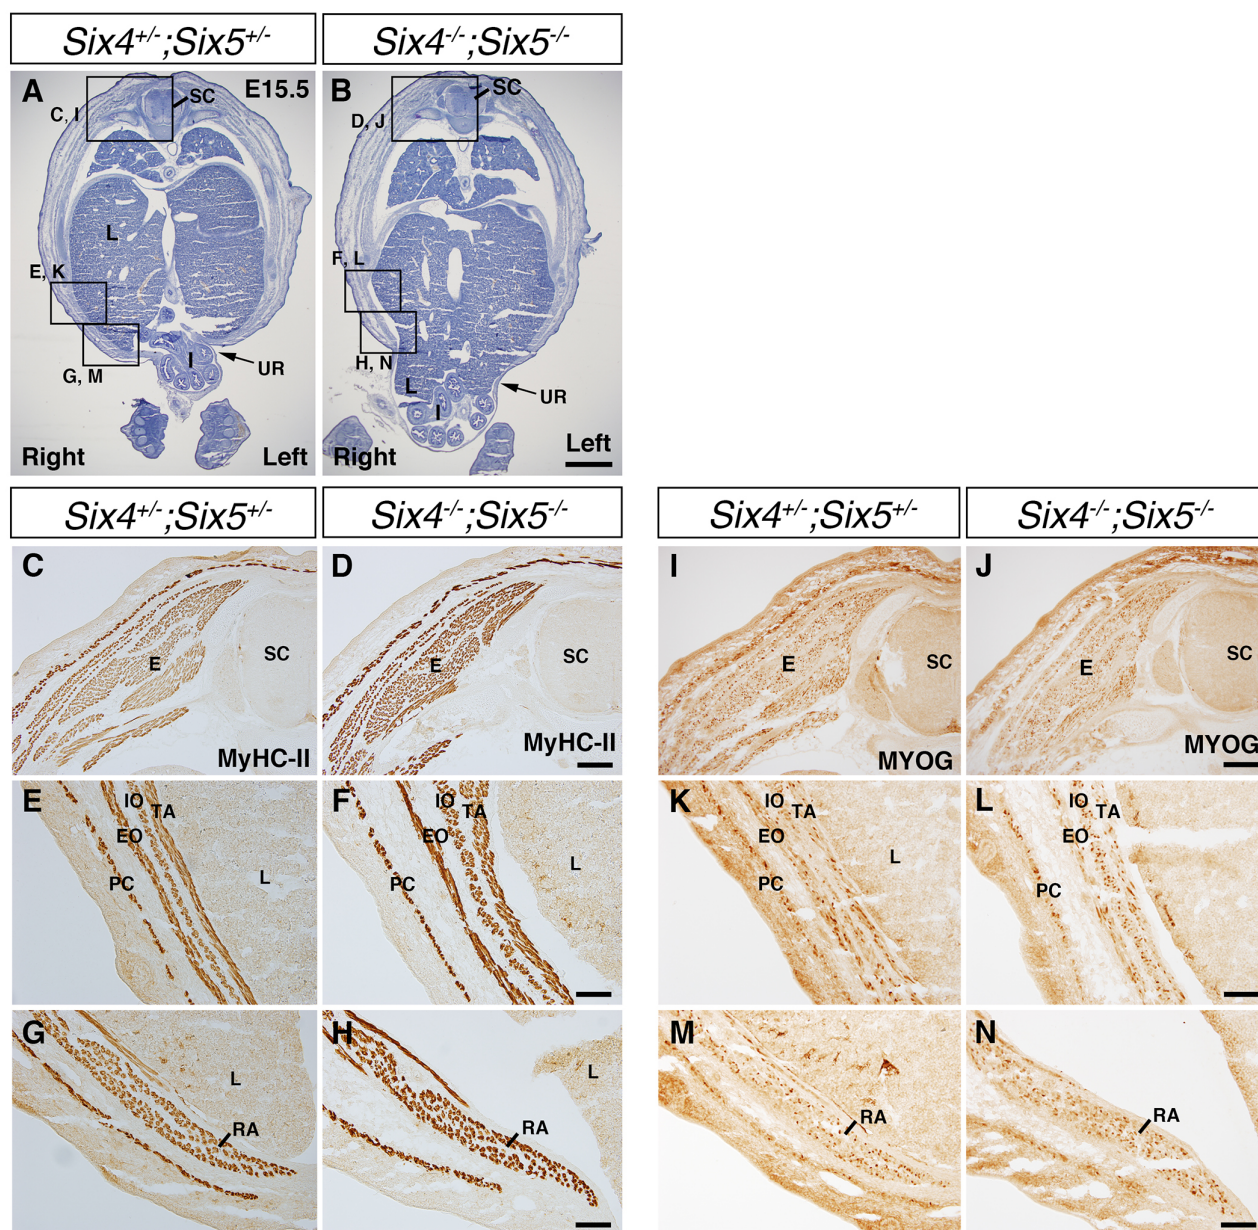

**Fig. S3. Organization of abdominal muscles in *Six4*<sup>+/-</sup>;*Six5*<sup>+/-</sup> and *Six4*<sup>-/-</sup>;*Six5*<sup>-/-</sup> fetuses at E15.5.** (A, B) Hematoxylin staining of cryosections at the umbilical ring level of *Six4*<sup>+/-</sup>;*Six5*<sup>+/-</sup> and *Six4*<sup>-/-</sup>;*Six5*<sup>-/-</sup> embryos. A *Six4*<sup>+/-</sup>;*Six5*<sup>+/-</sup> embryo shows physiological hernia (A). The liver is protruded into the umbilical cord in *Six4*<sup>-/-</sup>;*Six5*<sup>-/-</sup> embryos (B). (C-H, I-N) Each panel is magnified view of the areas surrounded by rectangles in A, B. Distribution of MyHC-II (C-H) and MYOG (I-N). E, extensor muscle; EO, external oblique muscle; I, intestine; IO, internal oblique muscle; L, liver; PC, panniculus carnosus muscle; RA, rectus abdominis muscle; SC, spinal cord; TA, transversus abdominis muscle; UR, umbilical ring. Scale bars: 500  $\mu$ m in A, B; 200  $\mu$ m in C, D, I, J; 100  $\mu$ m in E-H, K-N.

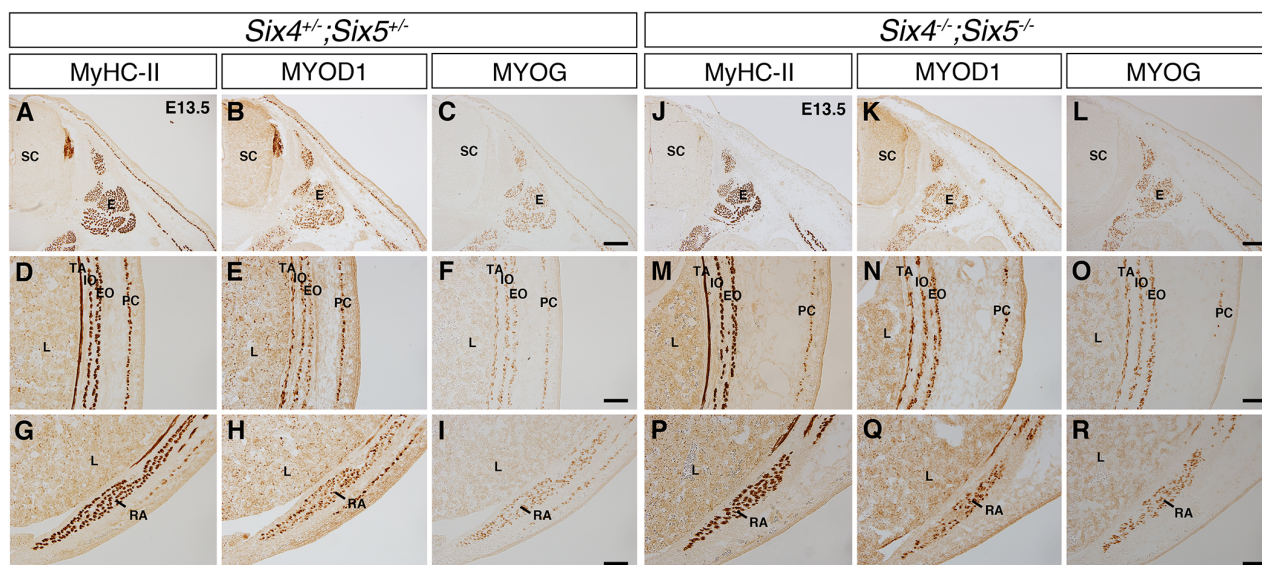

**Fig. S4. Expression of transcription factors related to muscle differentiation in myoblasts of *Six4<sup>+/-</sup>;Six5<sup>+/-</sup>* and *Six4<sup>-/-</sup>;Six5<sup>-/-</sup>* embryos at E13.5.** (A-R) Immunostaining of serial sections at the umbilical cord level in *Six4<sup>+/-</sup>;Six5<sup>+/-</sup>* (A-I) and *Six4<sup>-/-</sup>;Six5<sup>-/-</sup>* embryos (J-R). MyHC-II is used as a marker of skeletal muscles. MyHC-II localization patterns in extensor muscles (E) and four abdominal skeletal muscles, specifically the transversus abdominis muscle (TA), internal oblique muscle (IO), external oblique muscle (EO), panniculus carnosus muscle (PC), and rectus abdominis muscle (RA), in *Six4<sup>+/-</sup>;Six5<sup>+/-</sup>* embryos (A, D, G) are similar to those in *Six4<sup>-/-</sup>;Six5<sup>-/-</sup>* embryos (J, M, P). MYOD1 and MYOG are detected in abdominal skeletal muscle cells in both *Six4<sup>+/-</sup>;Six5<sup>+/-</sup>* (B-I) and *Six4<sup>-/-</sup>;Six5<sup>-/-</sup>* (K-R) embryos and show similar distributions except the downregulation in the PC. L, liver; SC, spinal cord. Scale bars: 200  $\mu$ m in A-C, J-L; 100  $\mu$ m in D-I, M-R.

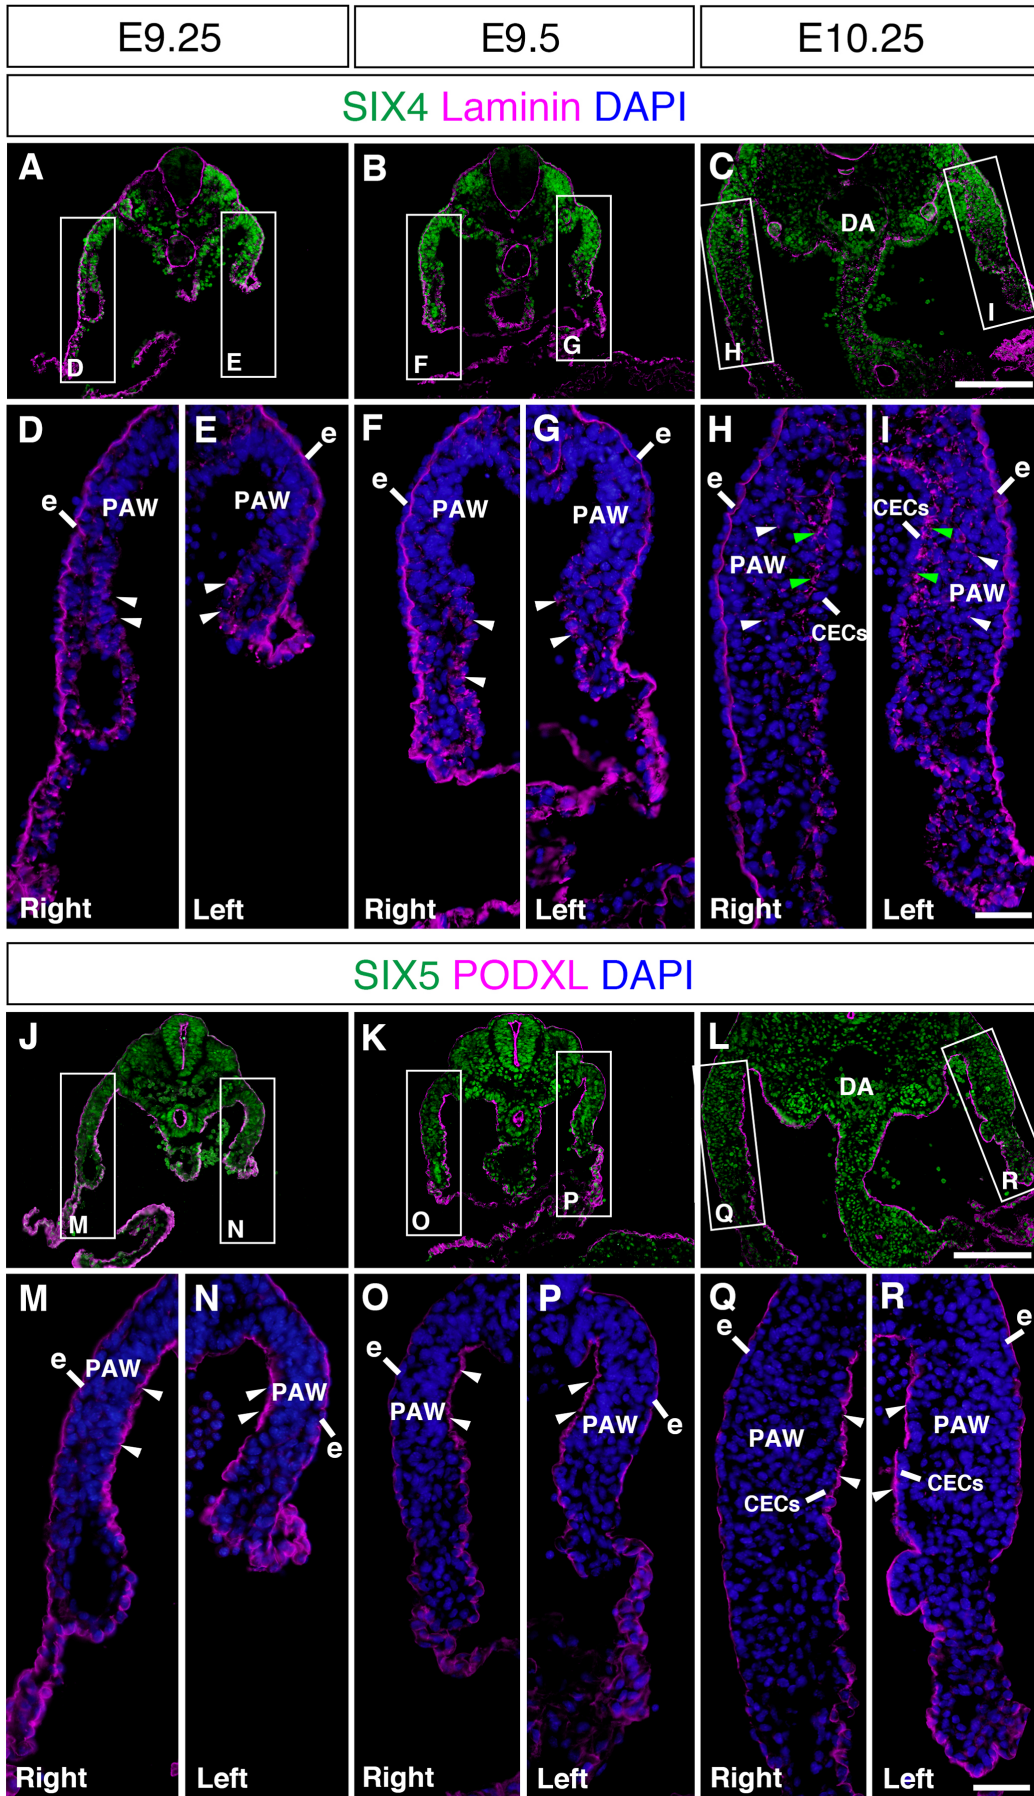

**Fig. S5. Localization of SIX4, SIX5, PODXL and laminin in the early PAW of wild-type embryos.** (A-I) Immunostaining with SIX4 and laminin antibodies in cross sections at the level of the PAW at E9.25 (A, D, E), E9.5 (B, F, G), and E10.25 (C, H, I). SIX4 is detected in the PAW through E9.25-E10.25 (A-C). Laminin accumulates in the basal side of surface ectodermal cells but not in the mesenchymal region of the PAW at E9.25 and E9.5. Scattered distribution of laminin is observed in the ventral region adjacent to the blood vessels at E9.25 and E9.5 (white arrowheads in D-G). Scattered distribution of laminin is observed in the mesenchymal region of the PAW (white arrowheads in H, I), and accumulation of laminin is detected in the border between the mesenchyme and the CE of the PAW at E10.25 (green arrowheads in H, I). (J-R) Immunostaining with SIX5 and PODXL antibodies in cross sections at the level of the PAW at E9.25 (J, M, N), E9.5 (K, O, P), and E10.25 (L, Q, R). SIX5 is detected in the PAW through E9.5-E10.25 (J-L). PODXL localizes in the apical side of CECs adjacent to the coelomic cavity (arrowheads in M-R) and the apical side of the surface ectoderm through E9.25-E10.25. Signals within the dorsal aorta (DA) are the auto-fluorescence of blood cells. CECs, coelomic epithelial cells; e, ectoderm; PAW, primary abdominal wall; Scale bars: 200  $\mu$ m in A-C, J-L; 50  $\mu$ m in D-I, M-R.

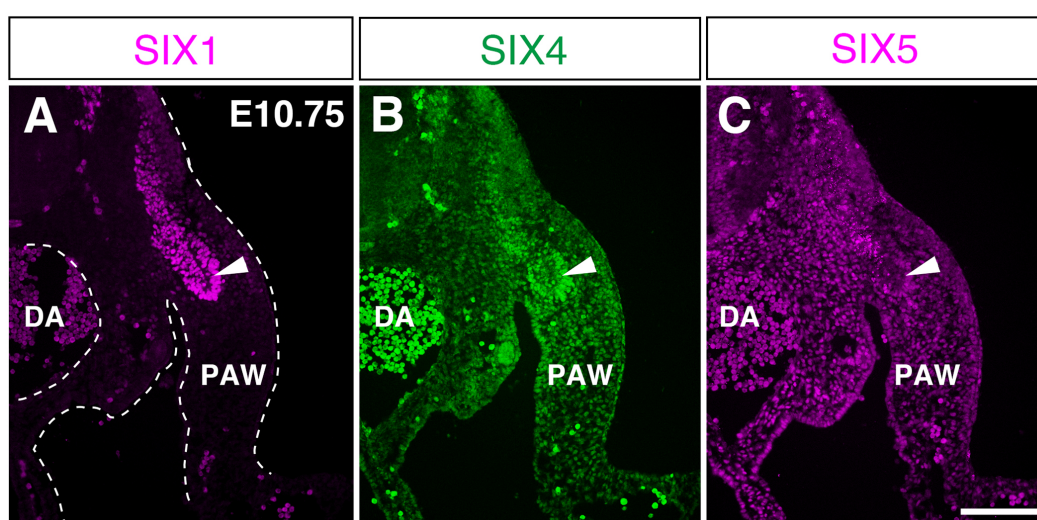

**Fig. S6. Localization of the SIX1, SIX4 and SIX5 proteins in wild-type embryos.** (A-C) SIX1 localizes in muscle progenitors (an arrowhead in A) but not in the PAW of wild-type embryos at E10.75. SIX4 and SIX5 localize in PAW cells and muscle progenitor cells (arrowheads in B, C). Signals within the dorsal aorta (DA) are the auto-fluorescence of blood cells. PAW, primary abdominal wall. Scale bars: 200  $\mu$ m in A-C.

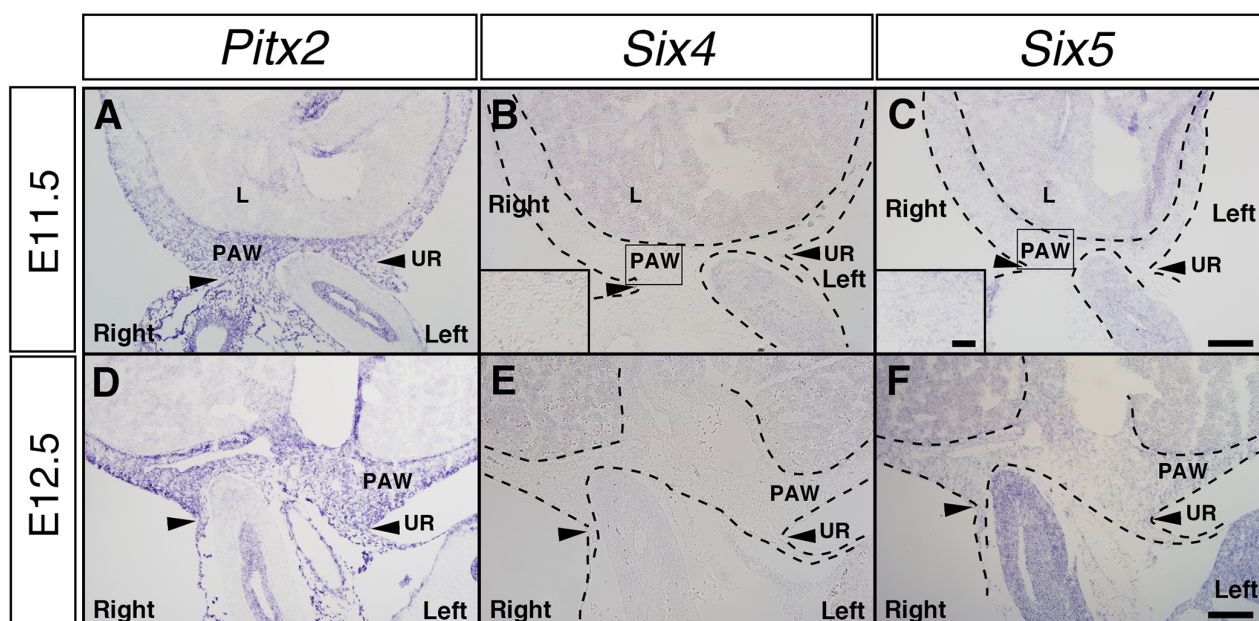

**Fig. S7. Expression of *Pitx2*, *Six4* and *Six5* mRNAs in the primary abdominal wall of wild-type embryos.** (A-F) *Pitx2* is used as a marker for the primary abdominal body wall (PAW). Arrowheads indicate the position of the umbilical ring (UR). At E11.5 and E12.5, *Pitx2* is expressed in the PAW (A, D), but *Six4* is not expressed in the PAW (B, E). *Six5* expression is observed in the PAW (C, F). Insets in B and C show higher magnification of the PAW in B and C, respectively. Dotted lines in B, C, E, F indicate the border of the body wall. L, Liver. Scale bars: 200  $\mu$ m in A-C; 50  $\mu$ m in inset in B, C; 200  $\mu$ m in D-F.

**Table S1. Genotypic analysis of fetuses at E18.5.**

|                            | WT         | <i>Six4<sup>+/+</sup></i> | <i>Six4<sup>-/-</sup></i> | Total number of fetuses |
|----------------------------|------------|---------------------------|---------------------------|-------------------------|
| Number of fetuses analyzed | 21 (24.7%) | 43 (50.6%)                | 21 (24.7%)                | 85 (from 10 litters*)   |
| Theoretical value          | 25%        | 50%                       | 25%                       |                         |

|                            | <i>Six5<sup>+/+</sup></i> | <i>Six5<sup>-/-</sup></i> | <i>Six4<sup>+/+</sup>;Six5<sup>+/+</sup></i> | <i>Six4<sup>+/+</sup>;Six5<sup>-/-</sup></i> | <i>Six4<sup>-/-</sup>;Six5<sup>+/+</sup></i> | <i>Six4<sup>-/-</sup>;Six5<sup>-/-</sup></i> | Total number of fetuses |
|----------------------------|---------------------------|---------------------------|----------------------------------------------|----------------------------------------------|----------------------------------------------|----------------------------------------------|-------------------------|
| Number of fetuses analyzed | 14 (10.7%)                | 16 (12.2%)                | 31 (23.7%)                                   | 39 (29.8%)                                   | 16 (12.2%)                                   | 15 (11.5%)                                   | 131 (from 17 litters**) |
| Theoretical value          | 12.5%                     | 12.5%                     | 25%                                          | 25%                                          | 12.5%                                        | 12.5%                                        |                         |

|                            | <i>Six5<sup>-/-</sup></i> | <i>Six4<sup>+/+</sup>;Six5<sup>-/-</sup></i> | <i>Six4<sup>-/-</sup>;Six5<sup>-/-</sup></i> | Total number of fetuses |
|----------------------------|---------------------------|----------------------------------------------|----------------------------------------------|-------------------------|
| Number of fetuses analyzed | 11 (27.5%)                | 15 (37.5%)                                   | 14 (35.0%)                                   | 40 (from 6 litters***)  |
| Theoretical value          | 25%                       | 50%                                          | 25%                                          |                         |

\* *Six4<sup>+/+</sup>* (♀) mated with *Six4<sup>+/+</sup>* (♂), \*\* *Six4<sup>+/+</sup>;Six5<sup>+/+</sup>* (♀) mated with *Six4<sup>+/+</sup>;Six5<sup>-/-</sup>* (♂), and \*\*\* *Six4<sup>+/+</sup>;Six5<sup>-/-</sup>* (♀) mated with *Six4<sup>+/+</sup>;Six5<sup>-/-</sup>* (♂).

**Table S2. Incidence of ventral body wall closure defects in fetuses of each genotype at E18.5.**

|                             | WT        | <i>Six4<sup>+/+</sup></i> | <i>Six5<sup>+/+</sup></i> | <i>Six4<sup>+/+</sup>;Six5<sup>+/+</sup></i> | <i>Six5<sup>-/-</sup></i> | <i>Six4<sup>-/-</sup></i> | <i>Six4<sup>+/+</sup>;Six5<sup>-/-</sup></i> | <i>Six4<sup>-/-</sup>;Six5<sup>+/+</sup></i> | <i>Six4<sup>-/-</sup>;Six5<sup>-/-</sup></i> |
|-----------------------------|-----------|---------------------------|---------------------------|----------------------------------------------|---------------------------|---------------------------|----------------------------------------------|----------------------------------------------|----------------------------------------------|
| Numbers of fetuses analyzed | 21        | 43                        | 13                        | 27                                           | 24                        | 21                        | 46                                           | 16                                           | 28                                           |
| Normal umbilical ring       | 21 (100%) | 43 (100%)                 | 13 (100%)                 | 26 (96.3%)                                   | 24 (100%)                 | 17 (81.0%)                | 39 (84.8%)                                   | 2 (12.5%)                                    | 0 (0%)                                       |
| Enlarged umbilical ring     | 0 (0%)    | 0 (0%)                    | 0 (0%)                    | 1 (3.7%)                                     | 0 (0%)                    | 4 (19.0%)                 | 5 (10.9%)                                    | 9 (56.3%)                                    | 0 (0%)                                       |
| Small omphalocele           | 0 (0%)    | 0 (0%)                    | 0 (0%)                    | 0 (0%)                                       | 0 (0%)                    | 0 (0%)                    | 2 (4.3%)                                     | 3 (18.8%)                                    | 9 (32.1%)                                    |
| Large omphalocele           | 0 (0%)    | 0 (0%)                    | 0 (0%)                    | 0 (0%)                                       | 0 (0%)                    | 0 (0%)                    | 0 (0%)                                       | 2 (12.5%)                                    | 19 (67.9%)                                   |

All fetuses were obtained from 10 litters of \* *Six4<sup>+/+</sup>* (♀) mated with *Six4<sup>+/+</sup>* (♂), 16 litters of *Six4<sup>+/+</sup>;Six5<sup>+/+</sup>* (♀) mated with *Six4<sup>+/+</sup>;Six5<sup>-/-</sup>* (♂), and 5 litters of *Six4<sup>+/+</sup>;Six5<sup>-/-</sup>* (♀) mated with *Six4<sup>+/+</sup>;Six5<sup>-/-</sup>* (♂).



**Table S3. Comparison of *Six4/Six5* double deficient mice and other mutant mice with middle-type omphalocele.**

| Mutated gene                                               | Protein category               | Primary abdominal wall defect (E10.5~E12.5) | Secondary abdominal wall defect (E13.5~)                 | Neural tube closure defects | Cleft palate | Limb malformation          | Class of middle-type omphalocele | References                                                                                                                                                                                                                                 |
|------------------------------------------------------------|--------------------------------|---------------------------------------------|----------------------------------------------------------|-----------------------------|--------------|----------------------------|----------------------------------|--------------------------------------------------------------------------------------------------------------------------------------------------------------------------------------------------------------------------------------------|
| <i>Six4/Six5</i> (double KO)                               | Transcription factor           | Yes                                         | No                                                       | No                          | No           | No                         | large & small                    | This study                                                                                                                                                                                                                                 |
| <i>Ataxin/AtaxinL1</i> (double KO)                         | DNA binding protein            | n.d.                                        | n.d.                                                     | Yes, hydrocephalus          | n.d.         | No                         | large                            | Lee et al. (2011). <i>Dev Cell</i> <b>21</b> , 746-757.                                                                                                                                                                                    |
| <i>Calr</i> (calreticulin)                                 | Cellular protein               | n.d.                                        | n.d.                                                     | No                          | n.d.         | No                         | small                            | Mesaeli et al. (1999). <i>J Cell Biol</i> <b>144</b> , 857-868.<br>Rauch et al. (2000). <i>Exp Cell Res</i> <b>256</b> , 105-111.                                                                                                          |
| <i>efnb1</i>                                               | Ligand                         | n.d.                                        | n.d.                                                     | No                          | n.d.         | Yes                        | large                            | Compagni et al. (2003). <i>Dev Cell</i> <b>5</b> , 217-230.                                                                                                                                                                                |
| <i>Ephb2/Ephb3</i> (double KO)                             | Receptor                       | n.d.                                        | n.d.                                                     | No                          | n.d.         | No                         | large                            | Dravis and Henkemeyer (2011). <i>Dev Biol</i> <b>355</b> , 138-151.                                                                                                                                                                        |
| <i>Fgfr1/Fgfr2</i> (double cKO using <i>Rosa Esr-Cre</i> ) | Receptor                       | n.d.                                        | Yes, disruption of dermis, muscle and connective tissues | No                          | n.d.         | No                         | small                            | Nichol et al. (2011). <i>J Pediatr Surg</i> <b>46</b> , 90-96.                                                                                                                                                                             |
| <i>Flna</i> (Filamin A)                                    | Cellular protein               | n.d.                                        | n.d.                                                     | No                          | n.d.         | No                         | large                            | Lian et al. (2012). <i>J Neurosci</i> <b>32</b> , 7672-7684.                                                                                                                                                                               |
| <i>Gad67</i>                                               | Enzyme                         | n.d.                                        | n.d.                                                     | No                          | Yes          | No                         | small                            | Oh et al. (2010). <i>PLoS One</i> <b>5</b> , e9758.<br>Saito et al. (2010). <i>Mol Brain</i> <b>3</b> , 40.<br>Kakizaki et al. (2015). <i>Neuroscience</i> <b>288</b> , 86-93                                                              |
| <i>Gad67/Gad57</i> (double KO)                             | Enzyme                         | n.d.                                        | n.d.                                                     | No                          | Yes          | No                         | small                            | Kakizaki et al. (2015). <i>Neuroscience</i> , <b>288</b> , 86-93.                                                                                                                                                                          |
| <i>Hic1</i>                                                | Zinc finger BTB domain protein | n.d.                                        | n.d.                                                     | Yes                         | Yes          | No                         | small                            | Carter et al. (2000). <i>Hum Mol Genet</i> <b>9</b> , 413-419.                                                                                                                                                                             |
| <i>Marcks</i>                                              | Protein kinase C substrate     | n.d.                                        | n.d.                                                     | Yes, anencephaly            | n.d.         | No                         | small                            | Chen et al. (1996). <i>Proc Natl Acad Sci USA</i> , <b>93</b> , 6275-6279.                                                                                                                                                                 |
| <i>MeKK4</i>                                               | Enzyme                         | n.d.                                        | n.d.                                                     | Yes                         | n.d.         | No                         | large                            | Abell et al. (2005). <i>Mol Cell Biol</i> <b>25</b> , 8948-8959.<br>Chi et al. (2005). <i>Proc Natl Acad Sci USA</i> <b>102</b> , 3846-3851.                                                                                               |
| <i>Nf2</i>                                                 | Cytoskeletal protein           | n.d.                                        | n.d.                                                     | Yes                         | n.d.         | n.d.                       | large                            | McLaughlin et al. (2007). <i>Proc Natl Acad Sci USA</i> , <b>104</b> , 3261-3266.                                                                                                                                                          |
| <i>Podxl</i> (podocalyxin)                                 | Membrane protein               | n.d.                                        | n.d.                                                     | No                          | n.d.         | No                         | small                            | Doyonnas et al. (2001). <i>J Exp Med</i> <b>194</b> , 13-27.                                                                                                                                                                               |
| <i>Rock1</i>                                               | Enzyme                         | n.d.                                        | Yes, epithelial cell differentiation defect              | No                          | n.d.         | No                         | large & small                    | Shimizu et al. (2005). <i>J Cell Biol</i> <b>168</b> , 941-953.<br>Thumkeo et al. (2005). <i>Genes Cells</i> <b>10</b> , 825-834.                                                                                                          |
| <i>Rock2</i>                                               | Enzyme                         | n.d.                                        | n.d.                                                     | No                          | n.d.         | No                         | small                            | Thumkeo et al. (2005). <i>Genes Cells</i> <b>10</b> , 825-834.                                                                                                                                                                             |
| <i>Slc12a5</i> ( <i>KCC2</i> )                             | Membrane transporter           | n.d.                                        | n.d.                                                     | No                          | n.d.         | No                         | large                            | Hübner et al. (2001). <i>Neuron</i> <b>30</b> , 515-524.                                                                                                                                                                                   |
| <i>Slc32a1</i> ( <i>VGAT</i> )                             | Membrane transporter           | n.d.                                        | n.d.                                                     | No                          | Yes          | No                         | large & small                    | Oh et al. (2010). <i>PLoS One</i> <b>5</b> , e9758.<br>Wojcik et al. (2006). <i>Neuron</i> <b>50</b> , 575-587.<br>Saito et al. (2010). <i>Mol Brain</i> <b>3</b> , 40.<br>Kakizaki et al. (2015). <i>Neuroscience</i> <b>288</b> , 86-93. |
| <i>Sox11</i>                                               | Transcription factor           | n.d.                                        | n.d.                                                     | No                          | Yes          | Yes                        | large                            | Sock et al. (2004). <i>Mol Cell Biol</i> <b>24</b> , 6635-6644.<br>Bhattaram et al. (2010). <i>Nat Commun</i> <b>1</b> , 9.                                                                                                                |
| <i>Tmem67</i>                                              | Membrane protein               | n.d.                                        | n.d.                                                     | No                          | n.d.         | n.d.                       | small                            | Abdelhamed et al. (2015). <i>Dis Model Mech</i> <b>3</b> , 527-541.                                                                                                                                                                        |
| <i>Trip11</i> ( <i>GMAP210</i> )                           | Golgi protein                  | n.d.                                        | n.d.                                                     | No                          | n.d.         | Yes, chondrogenesis defect | small                            | Follit et al. (2008). <i>PLoS Genet</i> <b>4</b> , e1000315.<br>Smits et al. (2010). <i>N Engl J Med</i> <b>362</b> , 206-216.                                                                                                             |

n.d., no data

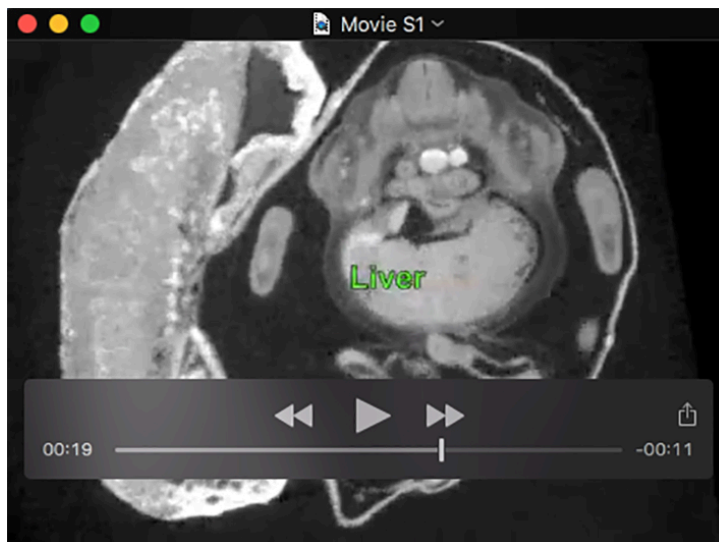

**Movie S1. Micro-CT cross-sections of the E12.5 wild-type mouse embryo (related to Fig. 3B')**

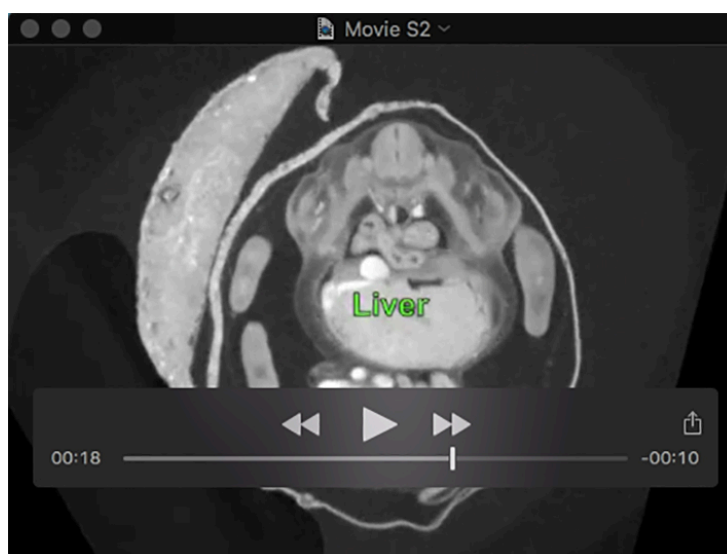

**Movie S2. Micro-CT cross-sections of the E12.5 *Six4*<sup>-/-</sup>;*Six5*<sup>-/-</sup> mouse embryo (related to Fig. 3D').**

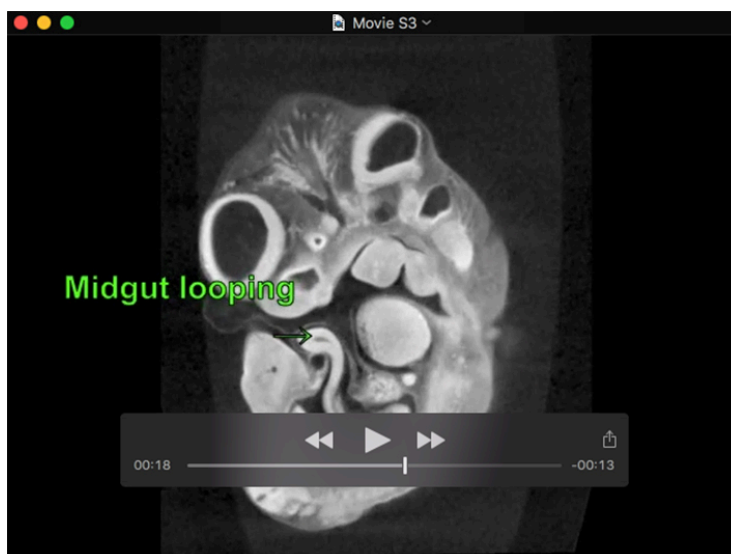

**Movie S3. Micro-CT sagittal-sections of the E11.5 wild-type embryo (related to Fig. 3E).**

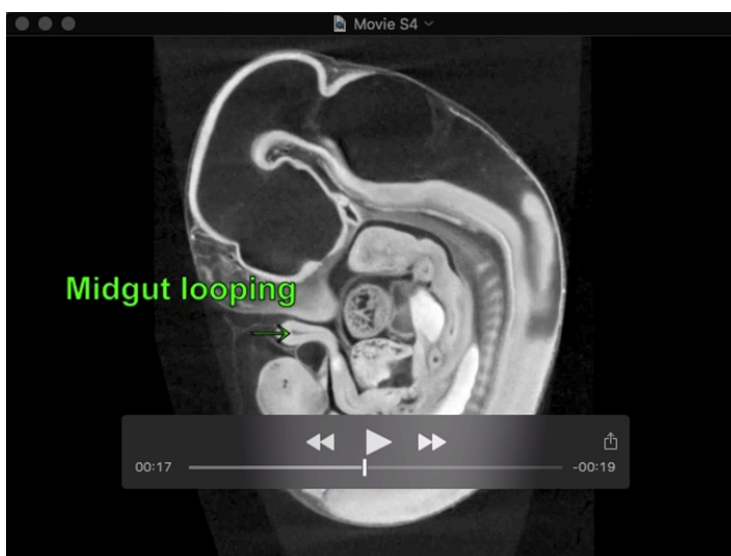

**Movie S4. Micro-CT sagittal-sections of the E11.5 *Six4*<sup>-/-</sup>; *Six5*<sup>-/-</sup> embryo (related to Fig. 3G).**
